# Supplementary material
Source: MDPI journal article supplement (https://www.mdpi.com/1424-8247/16/11/1607)
Supplement: s1 [file s1]

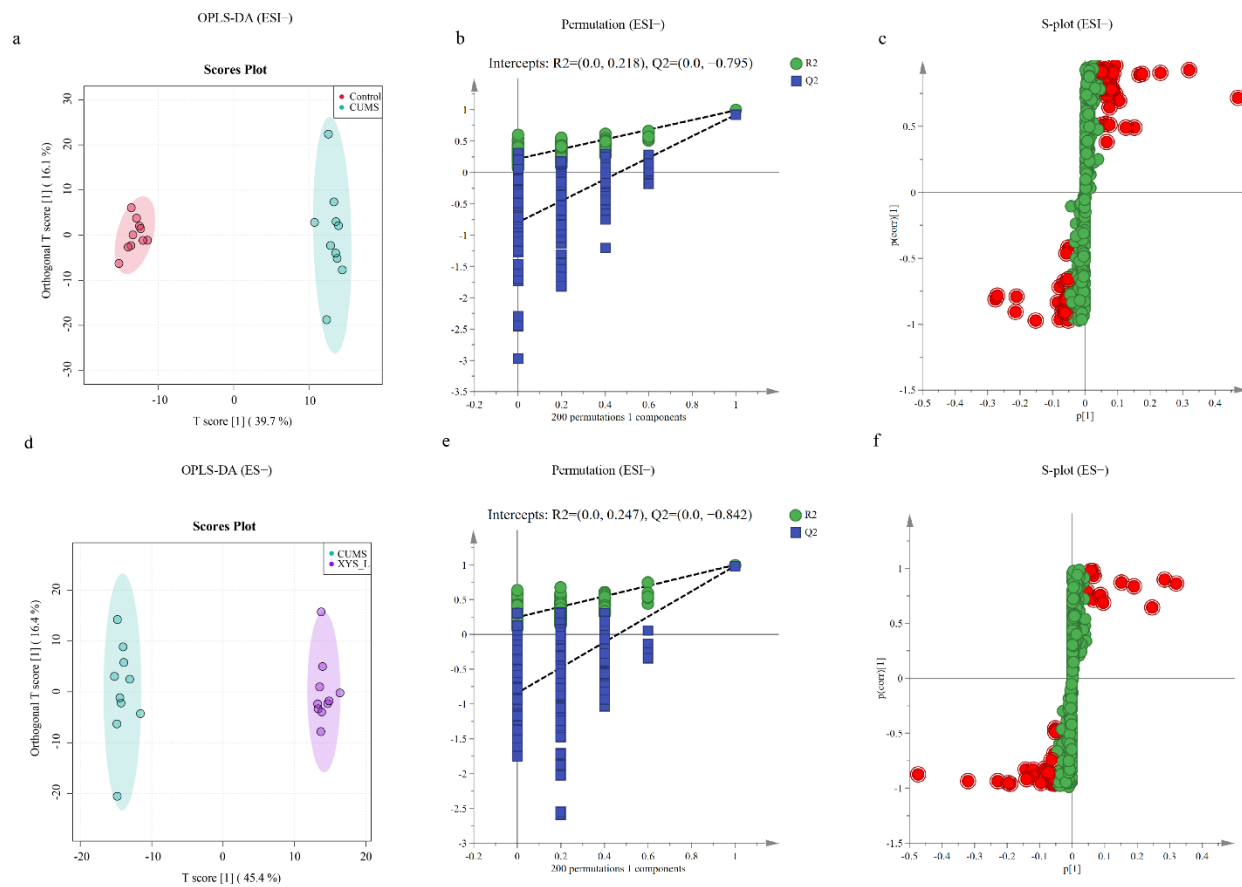

**Figure S1** The OPLS-DA score graph(a), permutation(b) and S-plot(c) of CUMS vs. XYZ-H groups as well as the plot of OPLS-DA(d) permutation(e) and S-plot(f) of CUMS vs. XYZ-H for negative ion mode.
